1  
2  
3  
4  
5  
6  
7  
8  
9  
10  
11  
12  
13  
14  
15  
16  
17  
18  
19  
20  
21  
22  
23  
24  
25  
26  
27  
28  
29  
30  
31  
32  
33  
34  
35  
36  
37  
38  
39  
40  
41  
42  
43  
44

# Increased connectivity among sensory and motor regions during visual and audiovisual speech perception

Jonathan E. Peelle<sup>1</sup>, Brent Spehar<sup>1</sup>, Michael S. Jones<sup>1</sup>, Sarah McConkey<sup>1</sup>,  
Joel Myerson<sup>2</sup>, Sandra Hale<sup>2</sup>, Mitchell S. Sommers<sup>2</sup>, Nancy Tye-Murray<sup>1</sup>

<sup>1</sup> Department of Otolaryngology, Washington University in St. Louis, St. Louis MO USA

<sup>2</sup> Department of Psychological and Brain Sciences, Washington University in St. Louis,  
St. Louis MO USA

Abbreviated title: Connectivity during audiovisual speech perception

**Conflicts of interest:** The authors declare no competing financial conflicts of interest.

**Acknowledgments:** This work was supported by grants R56 AG018029 and R01 DC016594 from the US National Institutes of Health. The multiband echo planar imaging sequence was provided by the University of Minnesota Center for Magnetic Resonance Research.

Please address correspondence to:

Dr. Jonathan Peelle  
Department of Otolaryngology  
Washington University in Saint Louis  
Saint Louis, MO 63110  
[jpeelle@wustl.edu](mailto:jpeelle@wustl.edu)

45

## Abstract

46 In everyday conversation, we usually process the talker's face as well as the sound of  
47 their voice. Access to visual speech information is particularly useful when the auditory  
48 signal is degraded. Here we used fMRI to monitor brain activity while adult humans (n =  
49 60) were presented with visual-only, auditory-only, and audiovisual words. The  
50 audiovisual words were presented in quiet and several signal-to-noise ratios. As  
51 expected, audiovisual speech perception recruited both auditory and visual cortex, with  
52 some evidence for increased recruitment of premotor cortex in some conditions  
53 (including in substantial background noise). We then investigated neural connectivity  
54 using psychophysiological interaction (PPI) analysis with seed regions in both primary  
55 auditory cortex and primary visual cortex. Connectivity between auditory and visual  
56 cortices was stronger in audiovisual conditions than in unimodal conditions, including a  
57 wide network of regions in posterior temporal cortex and prefrontal cortex. In addition to  
58 whole-brain analyses, we also conducted a region-of-interest analysis on the left  
59 posterior superior temporal sulcus (pSTS), implicated in many previous studies of  
60 audiovisual speech perception. We found evidence for both activity and effective  
61 connectivity in pSTS for visual-only and audiovisual speech, although these were not  
62 significant in whole-brain analyses. Taken together, our results suggest a prominent role  
63 for cross-region synchronization in understanding both visual-only and audiovisual  
64 speech that complements activity in "integrative" brain regions like pSTS.

65

66

67

68

## Introduction

69 Understanding speech in the presence of background noise is notoriously challenging,  
70 and when visual speech information is available, listeners make use of it—performance  
71 on audiovisual (AV) speech in noise is better than for auditory-only speech in noise  
72 (Sumbly and Pollack, 1954). Although there is consensus that listeners make use of  
73 visual information during speech perception, there is little agreement either on the  
74 neural mechanisms that support visual speech processing or on the way in which visual  
75 and auditory speech information are combined during audiovisual speech perception.

76 One longstanding perspective on audiovisual speech has been that auditory and  
77 visual information are processed through separate channels, and then integrated at a  
78 separate processing stage (Grant and Seitz, 1998; Massaro and Palmer, 1998).  
79 Audiovisual integration is thus often considered an individual ability that some people  
80 are better at and some people are worse at, regardless of their unimodal processing  
81 abilities (Magnotti and Beauchamp, 2015; Mallick et al., 2015).

82 However, more recent data have brought this traditional view into question. For  
83 example, Tye-Murray and colleagues (2016) showed that unimodal auditory-only and  
84 visual-only word recognition scores accurately predicted AV performance, and factor  
85 analyses revealed two unimodal ability factors with no evidence of a separate  
86 integrative ability factor. These findings suggest that rather than a separate stage of  
87 audiovisual integration, AV speech perception may depend most strongly on the  
88 coordination of auditory and visual inputs (Sommers, 2021).

89 Theoretical perspectives on audiovisual integration have also informed cognitive  
90 neuroscience approaches to AV speech perception. Prior functional neuroimaging  
91 studies of audiovisual speech processing have largely focused on identifying brain  
92 regions supporting integration. One possibility is that the posterior superior temporal  
93 sulcus (pSTS) combines auditory and visual information during speech perception. The  
94 pSTS is anatomically positioned between auditory cortex and visual cortex, and has the  
95 functional properties of a multisensory convergence zone (Beauchamp et al., 2004).  
96 During many audiovisual tasks, the pSTS is differentially activated by matching and mis-  
97 matching auditory-visual information, consistent with a role in integration (Stevenson  
98 and James, 2009). Moreover, functional connectivity between the pSTS and primary  
99 sensory regions varies with the reliability of the information in a modality (Nath and  
100 Beauchamp, 2011), suggesting that the role of the pSTS may be related to combining or  
101 weighing information from different senses.

102 A complementary proposal is that regions of premotor cortex responsible for  
103 representing articulatory information are engaged in processing speech (Okada and  
104 Hickok, 2009). The contribution of motor regions to speech perception is hotly debated.  
105 Evidence consistent with a motor contribution includes a self-advantage in both visual-  
106 only and AV speech perception (Tye-Murray et al., 2013, 2015), and effects of visual  
107 speech training on speech production (Fridriksson et al., 2009; Venezia et al., 2016).  
108 However, premotor activity is not consistently observed in neuroimaging studies of  
109 speech perception, and in some instances may also reflect non-perceptual processing  
110 (Szenkovits et al., 2012; Nuttall et al., 2016). It is also possible that premotor regions  
111 are only engaged in certain types of speech perception situations (for example, when  
112 there is substantial background noise, or when lipreading); individual differences in

113 hearing sensitivity or lipreading ability also may affect the involvement of premotor  
114 cortex.

115 In addition to looking for brain regions that support visual-only or AV speech  
116 perception, we therefore broaden our approach to study the role played by effective  
117 connectivity between auditory, visual, and motor regions. If a dedicated brain region is  
118 necessary to combine auditory and visual speech information, we would expect to see it  
119 active during audiovisual speech. If changes in effective connectivity (Friston, 1994;  
120 Stephan and Friston, 2010)—that is, task-based synchronized activity—underlie visual-  
121 only or audiovisual speech processing, we would expect to see greater connectivity  
122 between speech-related regions during these conditions relative to auditory-only  
123 speech. In service of these questions we tested auditory-only speech perception and  
124 AV speech perception at a range of signal-to-noise ratios (SNRs) and obtained out-of-  
125 scanner measures of lipreading ability from our participants (**Figure 1**).

126  
127

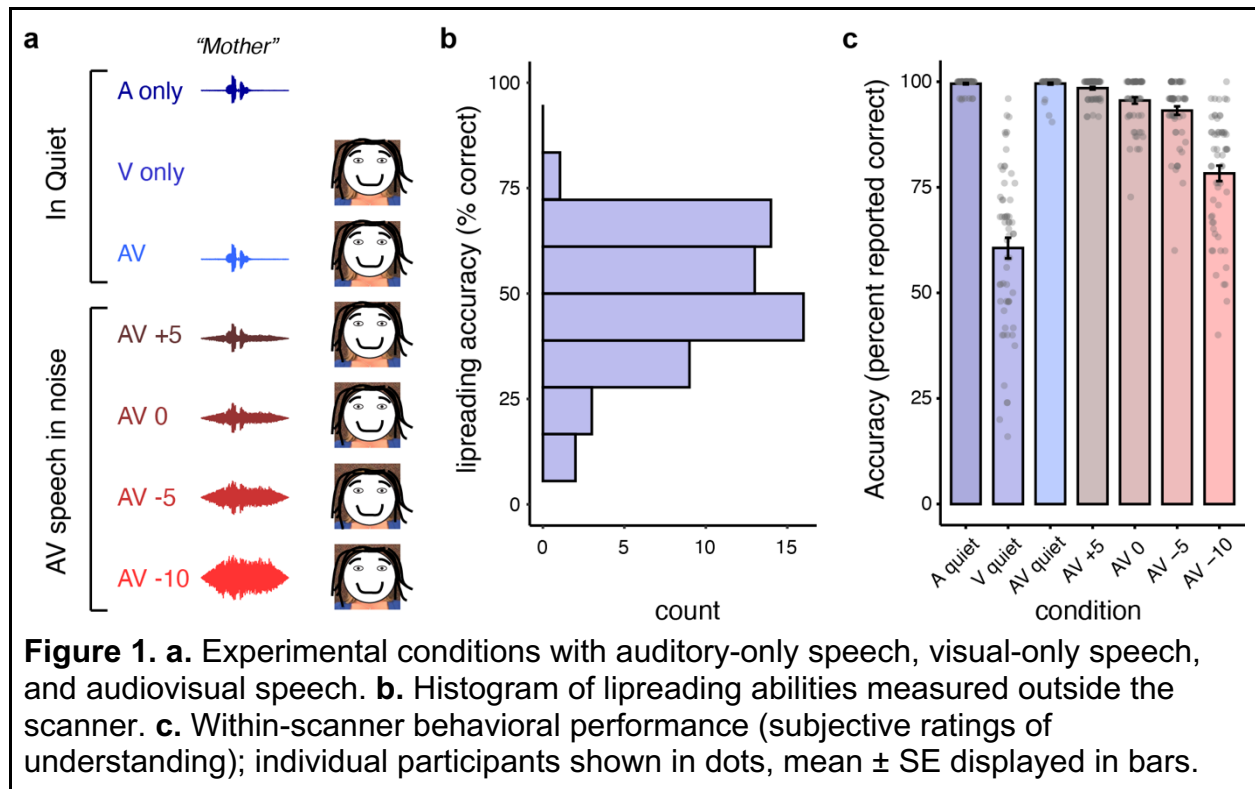

128  
129  
130  
131

## Method

132 Stimuli, behavioral data, analysis scripts, and results tables are available from  
133 <https://osf.io/qxcu8/>. MRI data are available on OpenNeuro (Markiewicz et al., 2021) at  
134 <https://doi.org/10.18112/openneuro.ds003717.v1.0.0>.

## 135 **Materials**

136 We created seven lists of 50 words. The stimuli were recordings of a female actor  
137 speaking single words. The talker sat in front of a neutral background and spoke words  
138 along with the carrier phrase “Say the word \_\_\_\_\_” into the camera. The actor was  
139 instructed to allow her mouth to relax to a slightly open and neutral position before each  
140 target word was spoken. The edited versions of the recordings used in the current  
141 experiment did not include a carrier phrase and were each 1.5 seconds long.  
142 Recordings were made using a Canon Elura 85 digital video camera and showed the  
143 talker’s head and shoulders. Digital capture and editing were done using Adobe  
144 Premiere Elements. The original capture format for the video was uncompressed .avi;  
145 the final versions used in the study were compressed as high quality .wmv files. Audio  
146 was leveled using Adobe Audition to ensure that each word had the same root mean  
147 squared (RMS) amplitude. Conditions that included background noise used RMS-  
148 leveled six-talker babble that was mixed and included in the final version of the file.

149 The 350 recordings used in the study were selected from a corpus of 970  
150 recordings of high frequency words (log HAL frequency 7.01–14.99) identified using the  
151 English Lexicon Project (Balota et al., 2007). The words that were selected for  
152 presentation in the lipreading (visual-only) or audiovisual (AV) conditions in varying  
153 signal-to-noise ratios (SNR) were selected from the larger corpus based on visual-only  
154 behavioral performance on each word from 149 participants (22–90 years old) who  
155 were tested using the entire corpus. The words selected ranged from 10%–93% correct  
156 in the lipreading-only behavioral tests. They were distributed among the six conditions  
157 that included visual information (AV in Quiet, AV +5 SNR, AV 0 SNR, AV -5 SNR, AV -  
158 10, and visual-only) so they would, on average, be equivalent for lipreading difficulty.  
159 The words used in the auditory-only condition were selected from the remaining words.

## 160 **Participants**

161 We collected data from 60 participants ranging in age from 18–34 years ( $M = 22.42$ ,  $SD$   
162  $= 3.24$ , 45 female). All were right-handed native speakers of American English (no other  
163 languages other than English before age 7) who self-reported normal hearing and an  
164 absence of neurological disease. All provided informed consent under a protocol  
165 approved by the Washington University in Saint Louis Institutional Review Board.

## 166 **Procedure**

167 Before being tested in the fMRI scanner all participants were consented, completed a  
168 safety screening, and completed an out-of-scanner lipreading assessment. The  
169 behavioral lipreading assessment consisted of 50 single word clips selected in the same  
170 way and taken from the same corpus of recorded material used in the scanner. The  
171 lipreading assessment was complete by presenting each video clip to the participant  
172 using a laptop. Participants were encouraged to verbally provide their best guess for  
173 each clip. Only verbatim responses to the stimuli were considered correct.

174 Participants were positioned in the scanner with insert earphones and a viewing  
175 mirror placed above the eyes to see a two-sided projection screen located at the head-  
176 side of the scanner. Those that wore glasses were provided scanner-friendly lenses that  
177 fit their prescription. Participants were also given a response box that they held in a  
178 comfortable position on their torso during testing. Each of the imaging runs presented

179 trials with recordings of audio, visual-only, audiovisual speech stimuli, or printed text via  
180 an image projected on the screen that was visible to the participant through the viewing  
181 mirror. A camera positioned at the entrance to the scanner bore was used to monitor  
182 participant movement. A well-being check and short conversation occurred before each  
183 run and, if needed, participants were reminded to stay alert and asked to try to reduce  
184 their movement.

185 Six runs were completed during the session. Each run lasted approximately 5.5  
186 minutes. The first five runs were perception runs and contained 98 trials each. The  
187 stimuli were presented in blocks of five experimental trials plus two null trials for each  
188 condition. The result was 14 blocks resulting in 70 experimental trials plus 28 null trials.  
189 All trials included 800 ms of quiet without a visual presentation before the stimuli began.  
190 During the null trials participants were presented with a fixation cross instead of the  
191 audiovisual presentation. The auditory-only condition did not include visual stimuli;  
192 instead a black screen was presented. The blocks were quasi-randomized so that two  
193 blocks from the same condition were never presented one right after the other and one  
194 null trial never occurred right after another.

195 To keep attention high, half of the experimental trials required a response from  
196 the participant. On response trials, a set of two dots appeared on the screen after the  
197 audiovisual/audio presentation. The right-side dot was green and the left-side dot was  
198 red. The participant was instructed to use the right-hand button on the response box to  
199 indicate “yes” if they were confident that they had been able to identify the previous  
200 word and to use the left-hand button if they felt they had not identified the previous word  
201 correctly.

202 After the initial five runs, a final run of 60 trials was presented in which  
203 participants saw a series of written words projected on the screen. The items were the  
204 same 50 words used for the behavioral visual-only assessment, but which did not  
205 appear in any of the other fMRI conditions. Each word stayed on the screen for 2.3  
206 seconds, followed by two green dots that appeared for 2.3 seconds. Participants were  
207 asked to say aloud the word that was presented during the period that the dots were on  
208 the screen. Ten null trials were randomly distributed throughout the sequence. Null trials  
209 lasted 1.5 seconds and included a fixation cross on the screen. The reading task was  
210 always the final run.

## 211 **Behavioral data analysis**

212 The out-of-scanner lipreading assessment was scored by taking the percentage of  
213 correct responses made by each participant, which we used as a covariate in the fMRI  
214 analyses, allowing us to explore patterns of brain activity that related to more successful  
215 lipreading ability. The in-scanner lipreading was scored similarly, except scores were  
216 based on participants’ own judgement of their accuracy. Because we had no way to  
217 verify lipreading accuracy in the scanner, we used these to assess qualitative  
218 differences in difficulty across condition rather than formal statistical analyses.

## 219 **MRI data acquisition and analysis**

220 MRI images were acquired on a Siemens Prisma 3T scanner using a 32-channel head  
221 coil. Structural images were acquired using a T1-weighted MPRAGE sequence with a  
222 voxel size of .8 x .8 x .8 mm. Functional images were acquired using a multiband

223 sequence (Feinberg et al., 2010) in axial orientation with an acceleration factor of 8 (TE  
224 = 37 ms), providing full-brain coverage with a voxel size of  $2 \times 2 \times 2$  mm. Each volume  
225 took 0.770 s to acquire. We used a sparse imaging paradigm (Edmister et al., 1999;  
226 Hall et al., 1999) with a repetition time of 2.47 s, leaving 1.7 s of silence on each trial.  
227 We presented words during this silent period, and during the repetition task, instructed  
228 participants to speak during a silent period to minimize the influence of head motion on  
229 the data.

230 Analysis of the MRI data was performed using Automatic Analysis version 5.4.0  
231 (Cusack et al., 2014) (RRID:SCR\_003560) that scripted a combination of SPM12  
232 (Wellcome Trust Centre for Neuroimaging) version 7487 (RRID:SCR\_007037) and FSL  
233 (FMRIB Analysis Group; Jenkinson et al., 2012) version 6.0.1 (RRID:SCR\_002823).  
234 Functional images were realigned, co-registered with the structural image, and spatially  
235 normalized to MNI space (including resampling to 2 mm voxels) using unified  
236 segmentation (Ashburner and Friston, 2005) before smoothing with an 8 mm FWHM  
237 Gaussian kernel. No slice-timing correction was used. First level models contained  
238 regressors for the condition of interest (event onset times convolved with a canonical  
239 hemodynamic response function). To reduce the effects of motion on statistical results  
240 we calculated framewise displacement (FD) using the 6 realignment parameters  
241 assuming the head as a sphere with radius 50 mm (Power et al., 2012). We censored  
242 frames exceeding an FD of 0.5, which resulted in approximately 8% data loss across all  
243 participants. Frames with FD values exceeding this threshold were modeled out by  
244 adding in one additional column to the design matrix for each high-motion scan (cf.  
245 Lemieux et al., 2007).

246 Psycho-physiological interaction (PPI) analyses are designed to estimate the  
247 effective connectivity between brain regions (Friston et al., 1997); that is, the degree to  
248 which task demands alter the functional connectivity (i.e., statistical dependence of time  
249 series) between a seed region and every other voxel in the brain. PPI analyses thus  
250 require identifying a seed region from which to extract a time course, and two (or more)  
251 tasks between which to compare connectivity with the seed region. For auditory and  
252 visual cortex ROIs (see below for definition), we extracted the time course of the seed  
253 region using SPM's VOI functionality, summarizing the time course as the first  
254 eigenvariate of the ROI after adjusting for effects of interest.

255 Contrast images from single subject analyses were analyzed at the second level  
256 using permutation testing (FSL *randomise*; 5000 permutations) with a cluster-forming  
257 threshold of  $p < .001$  (uncorrected) and results corrected for multiple comparisons  
258 based on cluster extent ( $p < .05$ ). Anatomical localization was performed using  
259 converging evidence from author experience (Devlin and Poldrack, 2007) viewing  
260 statistical maps overlaid in MRICroGL (Rorden and Brett, 2000), supplemented by atlas  
261 labels (Tzourio-Mazoyer et al., 2002).

## 262 **Regions of interest**

263 We defined regions of interest (ROIs) for the left posterior temporal sulcus (pSTS), left  
264 primary auditory cortex (A1), and left primary visual cortex (V1). For the pSTS, the ROI  
265 was defined as a 10 mm radius sphere centered at MNI coordinates ( $x=-54, y=-42, z=4$ )  
266 previously reported to be activated during audiovisual speech processing (Venezia et  
267 al., 2017). The ROIs for A1 and V1 were defined using the Anatomy Toolbox (Eickhoff et

268 al., 2005) (RRID:SCR\_013273) as the combination of Areas TE1.0, TE 1.1, and TE 1.2  
269 in the left hemisphere (Morosan et al., 2001) and the left half of area hOC1,  
270 respectively. For the non-PPI ROI analysis, data were extracted by taking the mean of  
271 all voxels in each ROI.

272  
273

## Results

274 Unthresholded statistical maps are available from NeuroVault (Gorgolewski et al., 2015)  
275 at <https://neurovault.org/collections/10922/>.

276 We first examined whole brain univariate effects by condition, shown in **Figure 2**.  
277 We observed temporal lobe activity in all conditions, including visual-only, and visual  
278 cortex activity in all conditions except auditory only.

279 We next related the activity during visual-only speech with the out-of-scanner  
280 lipreading score (**Figure 1b**). Across participants, lipreading accuracy ranged from 4–  
281 74% (mean = 47.75, SD = 15.49), and correlated with in-scanner ratings (Spearman rho  
282 = 0.38). We included out-of-scanner lipreading as a covariate to see whether individual  
283 differences in out-of-scanner scores related to visual-only activity; we did not find any  
284 significant relationship (positive or negative).  
285



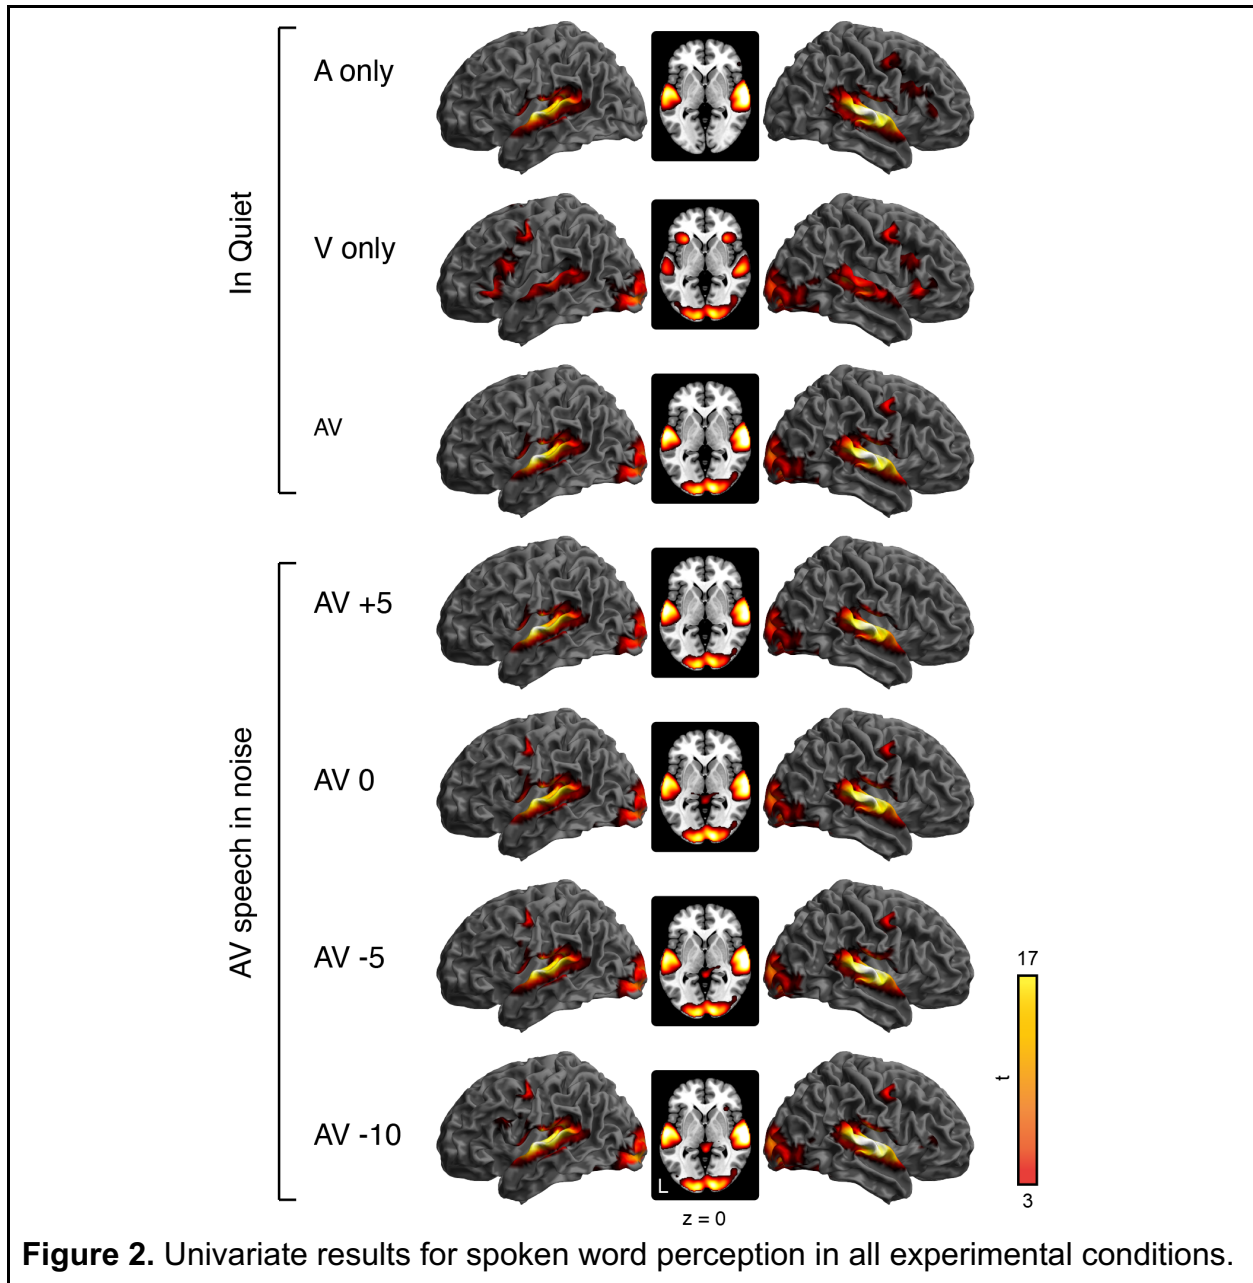

286  
287  
288  
289  
290  
291  
292  
293  
294

Following univariate analyses, we examined effective connectivity using psychophysiological interaction (PPI) models. We started by using a seed region in left visual cortex. As seen in **Figure 3**, compared to auditory-only speech, visual-only and all audiovisual conditions showed increased connectivity with the visual cortex seed, notably including bilateral superior temporal gyrus and auditory cortex. The same was true with an auditory cortex seed, shown in **Figure 4**. Here, compared to the visual-only condition, we see increased connectivity with visual cortex in all conditions except the auditory-only condition.

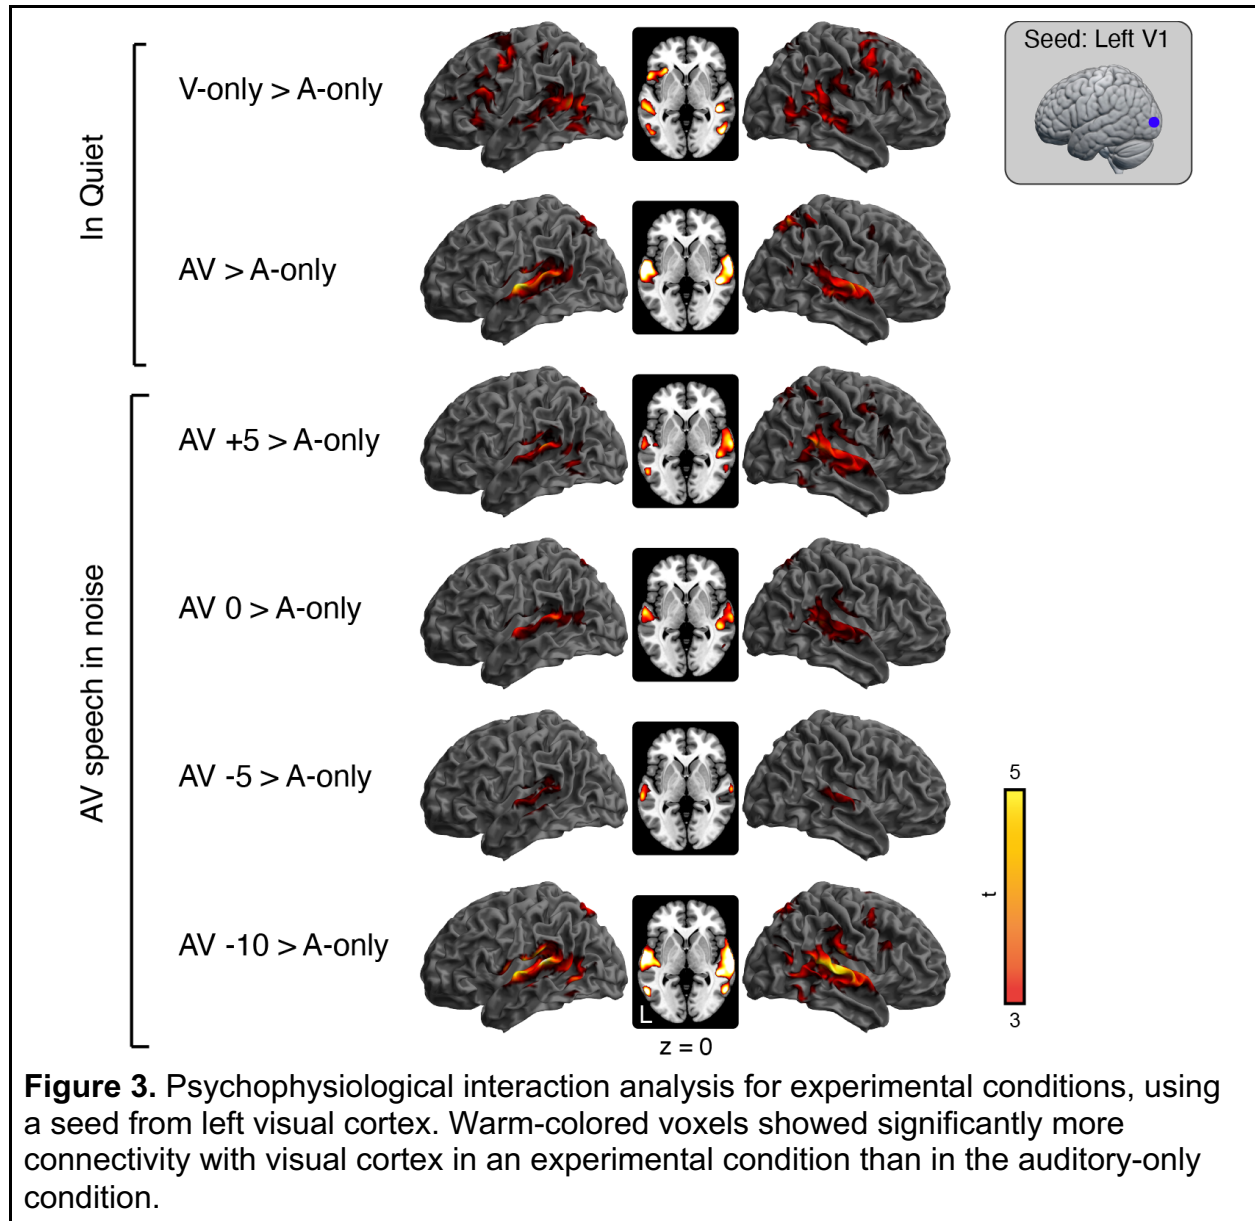

295

296

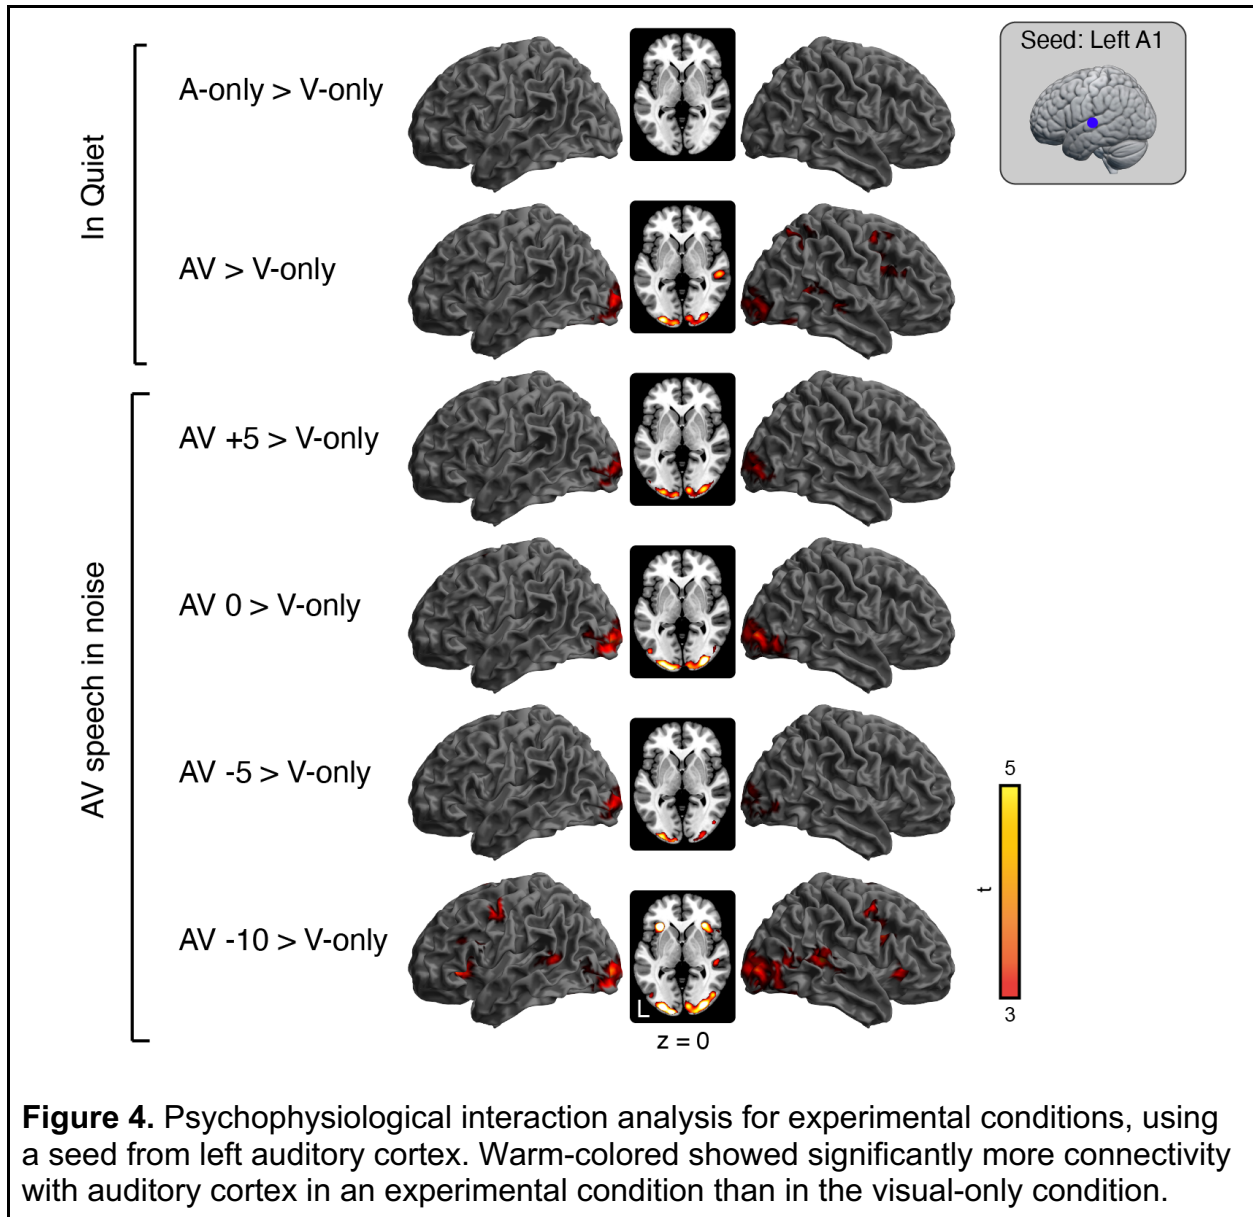

**Figure 4.** Psychophysiological interaction analysis for experimental conditions, using a seed from left auditory cortex. Warm-colored showed significantly more connectivity with auditory cortex in an experimental condition than in the visual-only condition.

297  
298  
299  
300  
301  
302

Finally, to complement the above whole-brain analyses, we conducted an ROI analyses focusing on pSTS, shown in **Figure 5**. For the whole-brain univariate and PPI analyses described above, we extracted values from left pSTS and used one-sample t-tests to see whether activity was significantly different from 0. Significance ( $p < .05$ , Bonferroni corrected for 19 tests giving  $p < .00263$ ) is indicated above each condition.

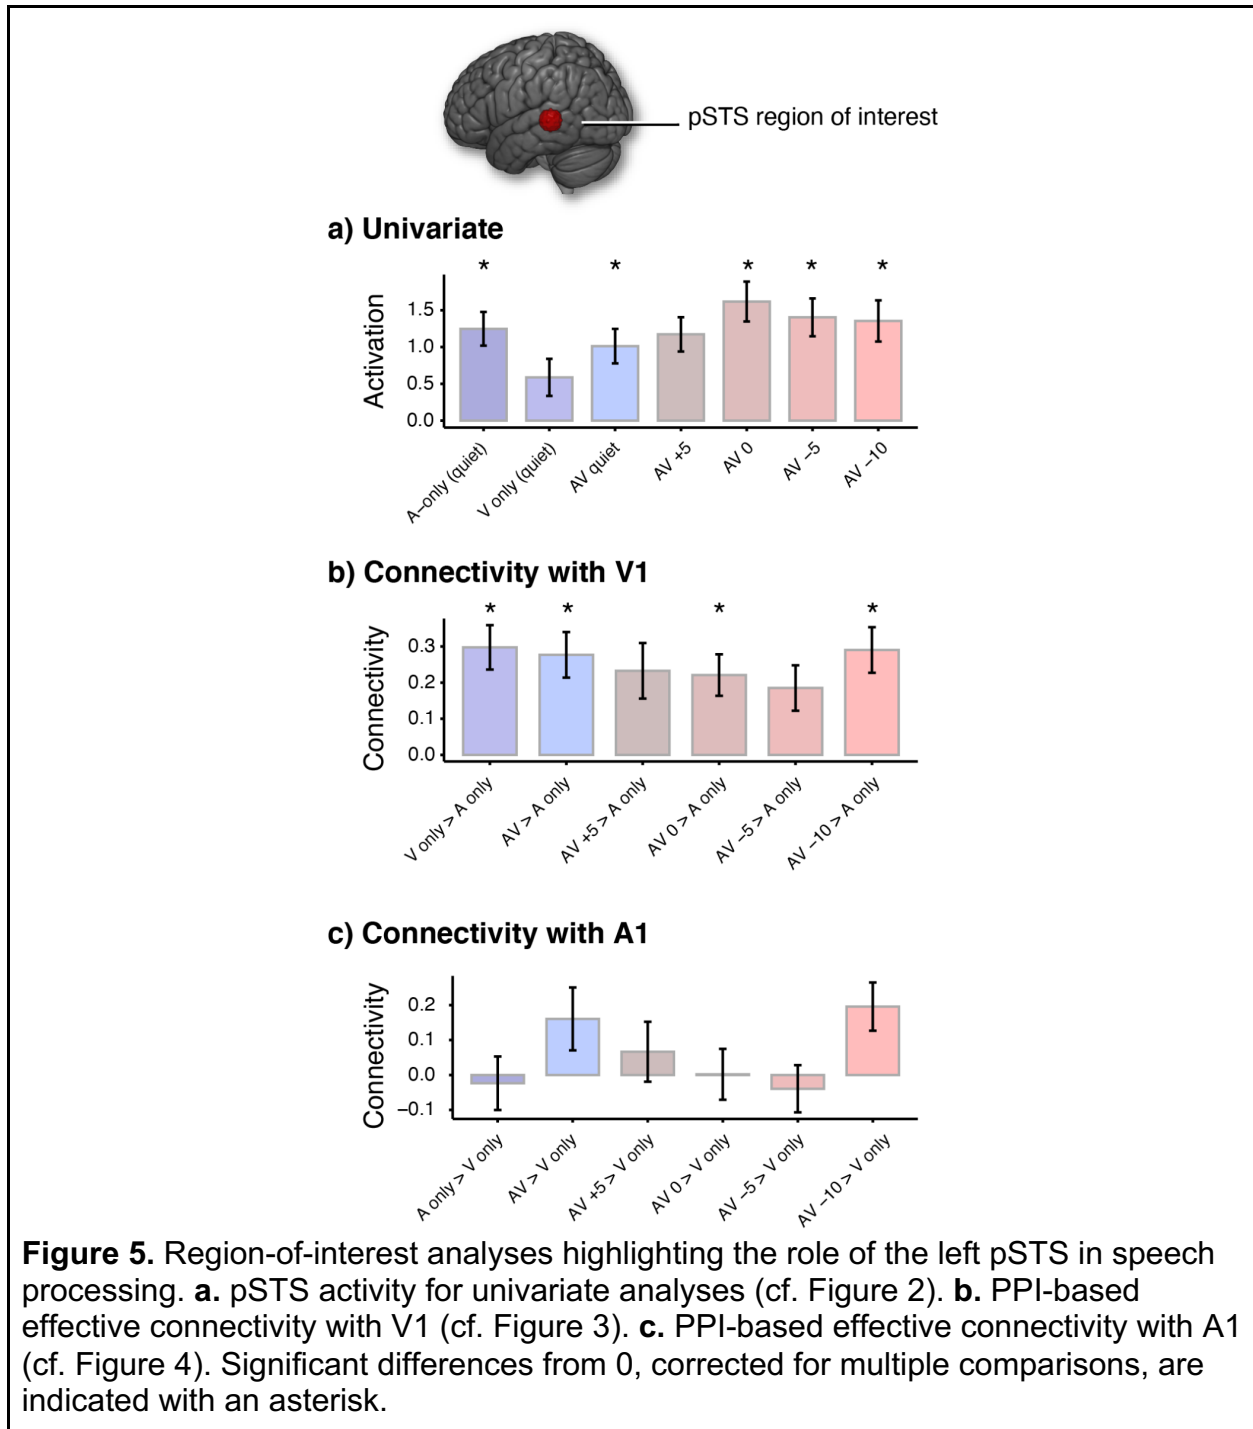

303

304

## Discussion

305

We studied brain activity associated with visual-only and audiovisual speech perception.

306

We found that connectivity between auditory, visual, and premotor cortex was enhanced

307

during audiovisual speech processing relative to unimodal processing, and during

308

visual-only speech processing relative to auditory-only speech processing. These

309 findings are broadly consistent with a role for synchronized interregional neural activity  
310 supporting visual and audiovisual speech perception.

### 311 **Dedicated regions for multisensory speech processing**

312 Although understanding audiovisual speech requires combining information from  
313 multiple modalities, the way this happens is unclear. One possibility is that heteromodal  
314 brain regions such as the pSTS act to integrate inputs from unisensory cortices. In  
315 addition to combining inputs to form a unitary percept, regions such as pSTS may also  
316 give more weight to more informative modalities (for example, to the visual signal when  
317 the auditory signal is noisy) (Nath and Beauchamp, 2011).

318 Activity in pSTS for visual-only or AV speech was suggested by both our whole-  
319 brain and ROI-based analyses. In particular, we observed pSTS activity for AV speech  
320 in which the auditory and visual aspects were consistently congruent, consistent with a  
321 role for pSTS in integrating or combining auditory and visual information. Of course,  
322 pSTS activity is not always observed for AV speech (Erickson et al., 2014). One  
323 potential explanation for the variability in pSTS activation across studies is nature of the  
324 speech materials. Several previous studies identifying pSTS involvement in  
325 multisensory speech perception have used incongruent stimuli (i.e., a McGurk task)  
326 (McGurk and MacDonald, 1976), which differs substantially from most of our everyday  
327 speech perception experience (Van Engen et al., 2019). Thus, the conditions under  
328 which pSTS is recruited to support visual or AV speech perception remains an open  
329 question.

330 In our univariate results, we observed activity in premotor cortex for both visual-  
331 only speech in quiet, and AV speech at more challenging signal-to-noise ratios. These  
332 findings are consistent with a flexible role for premotor cortex in speech perception, at  
333 least under some circumstances, as reported in other studies of visual and audiovisual  
334 speech perception (Venezia et al., 2017). Although our current data do not support  
335 specific conclusions, the dependence of premotor activity on task demands may explain  
336 some of the inconsistencies underlying the debates about the role of premotor cortex  
337 that permeate the speech perception literature.

### 338 **Effective connectivity and multisensory speech processing**

339 A different perspective comes from a focus on multisensory effects in auditory and  
340 visual cortex (Peelle and Sommers, 2015). Much of the support for this “early  
341 integration” view comes from electrophysiology studies showing multimodal effects in  
342 primary sensory regions (e.g., Schroeder and Foxe, 2005). For example, Lakatos and  
343 colleagues (2007) found that somatosensory input reset the phase of ongoing neural  
344 oscillations in auditory cortex, which was hypothesized to increase sensitivity to auditory  
345 stimuli. In at least one human MEG study, audiovisual effects appear sooner in auditory  
346 cortex than in pSTS (Möttönen et al., 2004), and visual speech may speed processing  
347 in auditory cortex (van Wassenhove et al., 2005). These findings suggest that  
348 multisensory effects are present in primary sensory regions, and that auditory and visual  
349 information do not require a separate brain region in which to “integrate”.

350 In the current data, we observed stronger connectivity between auditory and  
351 visual cortex for visual-only and audiovisual speech conditions than for unimodal  
352 auditory-only speech; and stronger connectivity in audiovisual speech conditions than in

353 unimodal visual-only speech. That is, using a visual cortex seed we found increases in  
354 effective connectivity with auditory cortex, and when using an auditory cortex seed we  
355 found increases in effective connectivity with visual cortex. These complementary  
356 findings indicate that functionally coordinated activity between primary sensory regions  
357 that is increased during audiovisual speech perception.

358 Beyond primary sensory cortices, we also observed effective connectivity  
359 changes to premotor cortex for both visual-only speech and several audiovisual  
360 conditions. The functional synchronization between visual cortex, auditory cortex, and  
361 premotor cortex is consistent with a distributed network that orchestrates activity in  
362 response to visual-only and audiovisual speech.

363 Finally, our ROI analysis showed increased effective connectivity between pSTS  
364 and V1, but not A1, under most experimental conditions (**Figure 5**). These effective  
365 connectivity changes with V1 are consistent with a role for pSTS in audiovisual speech  
366 processing. However, they are also not easily reconcilable with studies reporting  
367 connectivity differences between pSTS and both A1 and V1 (Nath and Beauchamp,  
368 2011). Although no doubt the location and size of any pSTS ROI chosen is important,  
369 we used the same ROI for the PPI analyses with both the A1 seed and V1 seed, and so  
370 ROI definition alone does not seem to explain the qualitative difference between the  
371 two.

372 It may be worth considering whether the pSTS plays different role in relation to  
373 A1 and V1. Just because pSTS responds to both auditory and visual information does  
374 not necessarily mean it treats them equally, or integrates them in a modality-agnostic  
375 manner. Indeed, given that “unisensory” cortices show multisensory effects and  
376 anatomical connections (Cappe & Barone, 2005), heteromodal or multisensory regions  
377 can also exhibit modality preferences (Noyce et al., 2017). In many audiovisual tasks,  
378 auditory information appears to be preferentially processed (Grondin and McAuley,  
379 2009; Grondin and Rousseau, 1991; Grahn et al. 2011; Recanzone, 2003). Thus, pSTS  
380 may be particularly important in integrating visual information into an existing auditory-  
381 dominated percept. Relatedly, it could also be that multimodal information is inextricably  
382 bound at early stages of perception (Rosenblum, 2008), a process which may rely on  
383 pSTS.

384 The emerging picture is one in which coordination of large-scale brain  
385 networks—that is, effective connectivity reflecting time-locked functional processing—is  
386 associated with visual-only and audiovisual speech processing. What might be the  
387 function of such distributed, coordinated activity? Visual and audiovisual speech appear  
388 to rely on multisensory representations. For audiovisual speech, it may seem obvious  
389 that successful perception requires combining auditory and visual information. However,  
390 visual-only speech has been consistently associated with activity in auditory cortex  
391 (Calvert et al., 1997; Okada et al., 2013). These activations may correspond to visual-  
392 auditory associations, and auditory-motor associations, learned from audiovisual  
393 speech that are automatically reactivated, even when the auditory input is absent.

394 Interestingly, our out-of-scanner lipreading scores did not correlate with any of  
395 the whole brain results. It should be noted, however, that our sample size, while large  
396 for fMRI studies of audiovisual speech processing, may still be too small to reliably  
397 detect individual differences in brain activity patterns (Yarkoni and Braver, 2010).  
398 Moreover, there may be multiple ways that brains can support better lipreading, and

399 such heterogeneity in brain patterns would not be evident in our current analyses.  
400 Future studies with larger sample sizes may be needed to quantitatively assess the  
401 degree to which users' activity might fall into neural strategies, and the degree to which  
402 these are related to lipreading performance.

403 It is worth highlighting an intriguing aspect of our data, which is that auditory  
404 cortex is always engaged, even in visual-only conditions, whereas the reverse is not  
405 true for visual cortex (which is only engaged when visual information is present) (**Figure**  
406 **2**). This observation may relate to deeper theoretical issues regarding the fundamental  
407 modality of speech representation. That is, if auditory representations have primacy (at  
408 least, for hearing people), we might expect these representations to be activated  
409 regardless of the input modality (i.e., for both auditory and visual speech). In fact, this is  
410 exactly what we have observed. Although these findings do not directly speak to the  
411 level of detail contained in visual cortex speech representations (Bernstein and  
412 Liebenthal, 2014), they are consistent with asymmetric auditory and visual speech  
413 representations.

#### 414 **Different perspectives on multisensory integration during speech perception**

415 An enduring challenge for understanding multisensory speech perception can be found  
416 in differing uses of the word "integration". During audiovisual speech perception,  
417 listeners use both auditory and visual information, and so from one perspective both  
418 kinds of information are necessarily "integrated" into a listener's (unified) perceptual  
419 experience. However, such use of both auditory and visual information does not  
420 necessitate a separable cognitive stage for integration (Tye-Murray et al., 2016;  
421 Sommers, 2021), nor does it necessitate a region of the brain devoted to integration.  
422 The interregional coordination we observed here may accomplish the task of integration  
423 in that both auditory and visual modalities are shaping perception. In this framework,  
424 there is no need to first translate visual and auditory speech information into some kind  
425 of common code (see also Altieri et al., 2011).

426 With any study it is important to consider how the specific stimuli used influenced  
427 the results. Here, we examined processing for single words. Visual speech can inform  
428 perception in multiple dimensions (Peelle and Sommers, 2015), including by providing  
429 clues to the speech envelope (Chandrasekaran et al., 2009). These clues may be more  
430 influential in connected speech (e.g., sentences) than in single words, as other neural  
431 processes may come into play with connected speech.

#### 432 **Conclusion**

433 Our findings demonstrate the scaffolding of connectivity between auditory, visual, and  
434 premotor cortices that supports visual-only and audiovisual speech perception. These  
435 findings suggest that the binding of multisensory information need not be restricted to  
436 heteromodal brain regions (e.g., pSTS), but may also emerge from coordinated  
437 unimodal activity throughout the brain.

438

439

## References

- 440 Altieri N, Pisoni DB, Townsend JT (2011) Some behavioral and neurobiological  
441 constraints on theories of audiovisual speech integration: a review and  
442 suggestions for new directions. *Seeing Perceiving* 24:513–539.
- 443 Ashburner J and Friston KJ (2005) Unified segmentation. *NeuroImage* 26: 839–851.
- 444 Beauchamp MS, Argall BD, Bodurka J, Duyn JH, Martin A (2004) Unraveling  
445 multisensory integration: patchy organization within human STS multisensory  
446 cortex. *Nature Neuroscience* 7:1190–1192.
- 447 Bernstein LE, Liebenthal E (2014) Neural pathways for visual speech perception. *Front*  
448 *Neurosci* 8:386.
- 449 Calvert GA, Bullmore ET, Brammer MJ, Campbell R, Williams SCR, McGuire PK,  
450 Woodruff PWR, Iversen SD, David AS (1997) Activation of auditory cortex during  
451 silent lipreading. *Science* 276:593–596.
- 452 Cappe C and Barone P (2005) Heteromodal connections supporting multisensory  
453 integration at low levels of cortical processing in the monkey. *The European*  
454 *journal of neuroscience* 22(11): 2886–2902.
- 455 Chandrasekaran C, Trubanova A, Stillitano S, Caplier A, Ghazanfar AA (2009) The  
456 natural statistics of audiovisual speech. *PLoS Comput Biol* 5:e1000436.
- 457 Cusack R, Vicente-Grabovetsky A, Mitchell DJ, Wild CJ, Auer T, Linke AC, Peelle JE  
458 (2014) Automatic analysis (aa): efficient neuroimaging workflows and parallel  
459 processing using Matlab and XML. *Front Neuroinform* 8:90.
- 460 Devlin JT, Poldrack RA (2007) In praise of tedious anatomy. *NeuroImage* 37:1033–  
461 1041.
- 462 Edmister WB, Talavage TM, Ledden PJ, Weisskoff RM (1999) Improved auditory cortex  
463 imaging using clustered volume acquisitions. *Hum Brain Mapp* 7:89–97.
- 464 Eickhoff SB, Stephan KE, Mohlberg H, et al. (2005) A new SPM toolbox for combining  
465 probabilistic cytoarchitectonic maps and functional imaging data. *NeuroImage*  
466 25(4): 1325–1335.
- 467 Erickson LC, Heeg E, Rauschecker JP, et al. (2014) An ALE meta-analysis on the  
468 audiovisual integration of speech signals. *Human brain mapping* 35(11): 5587–  
469 5605.
- 470 Feinberg DA, Moeller S, Smith SM, Auerbach E, Ramanna S, Glasser MF, Miller KL,  
471 Ugurbil K, Yacoub E (2010) Multiplexed echo planar imaging for sub-second  
472 whole brain fMRI and fast diffusion imaging. *PLoS One* 5:e15710.
- 473 Fridriksson J, Baker JM, Whiteside J, Eoute D Jr, Moser D, Vesselinov R, Rorden C  
474 (2009) Treating visual speech perception to improve speech production in  
475 nonfluent aphasia. *Stroke* 40:853–858.
- 476 Friston KJ (1994) Functional and effective connectivity in neuroimaging: A synthesis.  
477 *Hum Brain Mapp* 2:56–78.
- 478 Friston KJ, Buechel C, Fink GR, Morris J, Rolls E, Dolan RJ (1997) Psychophysiological  
479 and modulatory interactions in neuroimaging. *Neuroimage* 6:218–229.
- 480 Gorgolewski KJ, Varoquaux G, Rivera G, et al. (2015) NeuroVault.org: a web-based  
481 repository for collecting and sharing unthresholded statistical maps of the human  
482 brain. *Frontiers in Neuroinformatics* 9: 8.



- 483 Grahn JA, Henry MJ and McAuley JD (2011) fMRI investigation of cross-modal  
484 interactions in beat perception: Audition primes vision, but not vice versa.  
485 *NeuroImage* 54: 1231–1243.
- 486 Grant KW, Seitz PF (1998) Measures of auditory-visual integration in nonsense  
487 syllables and sentences. *J Acoust Soc Am* 104:2438–2450.
- 488 Hall DA, Haggard MP, Akeroyd MA, Palmer AR, Summerfield AQ, Elliott MR, Gurney  
489 EM, Bowtell RW (1999) “Sparse” temporal sampling in auditory fMRI. *Hum Brain*  
490 *Mapp* 7:213–223.
- 491 Jenkinson M, Beckmann CF, Behrens TEJ, Woolrich MW, Smith SM (2012) FSL.  
492 *NeuroImage* 62:782–790.
- 493 Lakatos P, Chen C-M, O’Connell MN, Mills A, Schroeder CE (2007) Neuronal  
494 oscillations and multisensory interaction in primary auditory cortex. *Neuron*  
495 53:279–292.
- 496 Lemieux L, Salek-Haddadi A, Lund TE, et al. (2007) Modelling large motion events in  
497 fMRI studies of patients with epilepsy. *Magnetic resonance imaging* 25(6): 894–  
498 901.
- 499 Magnotti JF, Beauchamp MS (2015) The noisy encoding of disparity model of the  
500 McGurk effect. *Psychon Bull Rev* 22:701–709.
- 501 Mallick DB, Magnotti JF, Beauchamp MS (2015) Variability and stability in the McGurk  
502 effect: contributions of participants, stimuli, time, and response type. *Psychon*  
503 *Bull Rev* 22:1299–1307.
- 504 Markiewicz CJ, Gorgolewski KJ, Feingold F, Blair R, Halchenko YO, Miller E,  
505 Hardcastle N, Wexler J, Esteban O, Goncalves M, Jwa A, Poldrack RA (2021)  
506 OpenNeuro: An open resource for sharing of neuroimaging data.  
507 bioRxiv:2021.06.28.450168 Available at:  
508 <https://www.biorxiv.org/content/10.1101/2021.06.28.450168v1.full.pdf+html>  
509 [Accessed July 5, 2021].
- 510 Massaro DW, Palmer SE Jr (1998) *Perceiving Talking Faces: From Speech Perception*  
511 *to a Behavioral Principle*. MIT Press.
- 512 McGurk H, MacDonald J (1976) Hearing lips and seeing voices. *Nature* 264:746–748.
- 513 Morosan P, Rademacher J, Schleicher A, Amunts K, Schormann T, Zilles K (2001)  
514 Human primary auditory cortex: Cytoarchitectonic subdivisions and mapping into  
515 a spatial reference system. *Neuroimage* 13:684–701.
- 516 Möttönen R, Schürmann M, Sams M (2004) Time course of multisensory interactions  
517 during audiovisual speech perception in humans: a magnetoencephalographic  
518 study. *Neurosci Lett* 363:112–115.
- 519 Nath AR, Beauchamp MS (2011) Dynamic changes in superior temporal sulcus  
520 connectivity during perception of noisy audiovisual speech. *J Neurosci* 31:1704–  
521 1714.
- 522 Nath AR, Beauchamp MS (2012) A neural basis for interindividual differences in the  
523 McGurk effect, a multisensory speech illusion. *Neuroimage* 59:781–787.
- 524 Noyce AL, Cestero N, Michalka SW, et al. (2017) Sensory-Biased and Multiple-Demand  
525 Processing in Human Lateral Frontal Cortex. *J Neurosci* 37(36): 8755–8766.
- 526 Nuttall HE, Kennedy-Higgins D, Hogan J, Devlin JT, Adank P (2016) The effect of  
527 speech distortion on the excitability of articulatory motor cortex. *NeuroImage*  
528 128:218–226.

- 529 Okada K, Hickok G (2009) Two cortical mechanisms support the integration of visual  
530 and auditory speech: A hypothesis and preliminary data. *Neurosci Lett* 452:219–  
531 223.
- 532 Okada K, Venezia JH, Matchin W, Saberi K, Hickok G (2013) An fMRI study of  
533 audiovisual speech perception reveals multisensory interactions in auditory  
534 cortex. *PLoS One* 8:e68959.
- 535 Peelle JE, Sommers MS (2015) Prediction and constraint in audiovisual speech  
536 perception. *Cortex* 68:169–181.
- 537 Power JD, Barnes KA, Snyder AZ, Schlaggar BL, Petersen SE (2012) Spurious but  
538 systematic correlations in functional connectivity MRI networks arise from subject  
539 motion. *NeuroImage* 59:2142–2154.
- 540 Rorden C, Brett M (2000) Stereotaxic display of brain lesions. *Behav Neurol* 12:191–  
541 2000.
- 542 Rosenblum LD (2008) Speech Perception as a Multimodal Phenomenon. *Current*  
543 *directions in psychological science* 17(6): 405–409.
- 544 Schroeder CE, Foxe J (2005) Multisensory contributions to low-level, “unisensory”  
545 processing. *Curr Opin Neurobiol* 15:454–458.
- 546 Sommers MS (2021) Santa Claus, the tooth fairy, and auditory-visual integration. *The*  
547 *Handbook of Speech Perception*. pp. 517–539 Available at:  
548 <https://onlinelibrary.wiley.com/doi/10.1002/9781119184096.ch19>.
- 549 Stephan KE, Friston KJ (2010) Analyzing effective connectivity with functional magnetic  
550 resonance imaging. *Wiley Interdiscip Rev Cogn Sci* 1:446–459.
- 551 Stevenson RA, James TW (2009) Audiovisual integration in human superior temporal  
552 sulcus: Inverse effectiveness and the neural processing of speech and object  
553 recognition. *Neuroimage* 44:1210–1223.
- 554 Sumbly WH, Pollack I (1954) Visual contribution to speech intelligibility in noise. *J*  
555 *Acoust Soc Am* 26:212–215.
- 556 Szenkovits G, Peelle JE, Norris D, Davis MH (2012) Individual differences in premotor  
557 and motor recruitment during speech perception. *Neuropsychologia* 50:1380–  
558 1392.
- 559 Tye-Murray N, Spehar B, Myerson J, Hale S, Sommers M (2016) Lipreading and  
560 audiovisual speech recognition across the adult lifespan: Implications for  
561 audiovisual integration. *Psychol Aging* 31:380–389.
- 562 Tye-Murray N, Spehar BP, Myerson J, Hale S, Sommers MS (2013) Reading your own  
563 lips: Common-coding theory and visual speech perception. *Psychon Bull Rev*  
564 20:115–119.
- 565 Tye-Murray N, Spehar BP, Myerson J, Hale S, Sommers MS (2015) The self-advantage  
566 in visual speech processing enhances audiovisual speech recognition in noise.  
567 *Psychon Bull Rev* 22:1048–1053.
- 568 Tzourio-Mazoyer N, Landeau B, Papathanassiou D, Crivello F, Etard O, Delcroix N,  
569 Mazoyer B, Joliot M (2002) Automated anatomical labeling of activations in SPM  
570 using a macroscopic anatomical parcellation of the MNI MRI single-subject brain.  
571 *Neuroimage* 15:273–289.
- 572 Van Engen KJ, Dey A, Sommers M, Peelle JE (2019) Audiovisual speech perception:  
573 Moving beyond McGurk. Available at: [psyarxiv.com/6y8qw](https://psyarxiv.com/6y8qw).

- 574 van Wassenhove V, Grant KW, Poeppel D (2005) Visual speech speeds up the neural  
575 processing of auditory speech. *Proc Natl Acad Sci U S A* 102:1181–1186.
- 576 Venezia JH, Fillmore P, Matchin W, Isenberg AL, Hickok G, Fridriksson J (2016)  
577 Perception drives production across sensory modalities: A network for  
578 sensorimotor integration of visual speech. *Neuroimage* 126:196–207.
- 579 Venezia JH, Vaden KI Jr, Rong F, Maddox D, Saberi K, Hickok G (2017) Auditory,  
580 Visual and Audiovisual Speech Processing Streams in Superior Temporal  
581 Sulcus. *Front Hum Neurosci* 11:174.
- 582 Yarkoni T, Braver TS (2010) Cognitive neuroscience approaches to individual  
583 differences in working memory and executive control: Conceptual and  
584 methodological issues. In: *Handbook of Individual Differences in Cognition*  
585 (Gruszka A, Matthews G, Szymura B, eds), pp 87–107. New York: Springer.  
586
